# Supplementary material
Source: PubMed Central journal article supplement (PMC3233052)
Supplement: supp_77.23.8325_AEM-AEM06507-11-s01.pdf [file supp_77.23.8325_AEM-AEM06507-11-s01.pdf]

| Information on the isolate      |                 |                  |         | MLVA locus copy number |      |       |       |      |       |       |       | Allele <sup>b</sup> |            | PCR serovar                 | PCR reaction |              |
|---------------------------------|-----------------|------------------|---------|------------------------|------|-------|-------|------|-------|-------|-------|---------------------|------------|-----------------------------|--------------|--------------|
| Isolate <sup>a</sup> (serotype) | origin          | origin type      | country | Lm-2                   | Lm-8 | Lm-10 | Lm-11 | Lm-3 | Lm-23 | Lm-15 | Lm-32 | <i>actA</i>         | <i>inI</i> | classification <sup>d</sup> | <i>inl F</i> | <i>inl G</i> |
| <b>Clonal complex A</b>         |                 |                  |         |                        |      |       |       |      |       |       |       |                     |            |                             |              |              |
| CHUV 037/2006 (4b)              | Human; Clinical | CSF <sup>e</sup> | CH      | 17                     | 4    | 2     | 4     | 1    | 17    | 2     | 18    | 3                   | 1          | nd                          | +            | -            |
| CHUV 144/2006 (4b)              | Human; Clinical | Neonatal inf.    | CH      | 5                      | 3    | 2     | 4     | 1    | 17    | 2     | 18    | 3                   | 1          | 4b; 4d; 4e                  | +            | -            |
| CHUV 212/2005 (4b)              | Human; Clinical | CSF <sup>e</sup> | CH      | 17                     | 3    | 2     | 4     | 2    | 17    | 3     | 19    | 3                   | 1          | 4b; 4d; 4e                  | +            | -            |
| CHUV 253/2005 (4b)              | Human; Clinical | Neonatal inf.    | CH      | 17                     | 3    | 2     | 5     | 2    | 17    | 2     | 18    | 3                   | 1          | 4b; 4d; 4e                  | +            | -            |
| L101/2007                       | Bovine          | Brain            | CH      | 17                     | 3    | 2     | 4     | 2    | 17    | 2     | 18    | 3                   | 1          | 4b; 4d; 4e                  | +            | -            |
| L102/2007                       | Bovine          | Brain            | CH      | 17                     | 3    | 2     | 4     | 2    | 17    | 2     | 18    | 3                   | 1          | 4b; 4d; 4e                  | +            | -            |
| L103/2007                       | Bovine          | Brain            | CH      | 17                     | 3    | 2     | 4     | 1    | 22    | 2     | 18    | 3                   | 1          | 4b; 4d; 4e                  | +            | -            |
| L104/2007                       | Bovine          | Brain            | CH      | 16                     | 3    | 2     | 4     | 2    | 17    | 2     | 18    | 3                   | 1          | 4b; 4d; 4e                  | +            | -            |
| L105/2007                       | Bovine          | Brain            | CH      | 16                     | 3    | 2     | 4     | 1    | 17    | 2     | 18    | 3                   | 1          | 4b; 4d; 4e                  | +            | -            |
| L108/2007                       | Bovine          | Brain            | CH      | 16                     | 3    | 2     | 4     | 1    | 16    | 2     | 18    | 3                   | 1          | 4b; 4d; 4e                  | +            | -            |
| L11/2007                        | Goat            | Brain            | CH      | 18                     | 3    | 2     | 5     | 2    | 17    | 3     | 19    | 3                   | 1          | 4b; 4d; 4e                  | +            | -            |
| L110/2007                       | Bovine          | Brain            | CH      | 16                     | 3    | 2     | 4     | 1    | 17    | 2     | 18    | 3                   | 1          | 4b; 4d; 4e                  | +            | -            |
| L113/2007                       | Bovine          | Brain            | CH      | 16                     | 3    | 2     | 4     | 1    | 17    | 2     | 18    | 3                   | 1          | 4b; 4d; 4e                  | +            | -            |
| L115/2007                       | Bovine          | Brain            | CH      | 16                     | 3    | 2     | 4     | 1    | 17    | 0     | 19    | 3                   | 1          | 4b; 4d; 4e                  | +            | -            |
| L117/2007                       | Bovine          | Brain            | CH      | 16                     | 3    | 2     | 4     | 1    | 17    | 2     | 17    | 3                   | 1          | 4b; 4d; 4e                  | +            | -            |
| L118/2007                       | Bovine          | Brain            | CH      | 17                     | 3    | 2     | 4     | 1    | 16    | 2     | 18    | 3                   | 1          | 4b; 4d; 4e                  | +            | -            |
| L119/2007                       | Bovine          | Brain            | CH      | 17                     | 3    | 2     | 4     | 2    | 17    | 2     | 18    | 3                   | 1          | 4b; 4d; 4e                  | +            | -            |
| L120/2007                       | Bovine          | Brain            | CH      | 16                     | 3    | 2     | 4     | 1    | 17    | 2     | 18    | 3                   | 1          | 4b; 4d; 4e                  | +            | -            |
| L123/2007                       | Bovine          | Brain            | CH      | 16                     | 3    | 2     | 4     | 1    | 17    | 2     | 18    | 3                   | 1          | 4b; 4d; 4e                  | +            | -            |
| L129/2007                       | Goat            | Brain            | CH      | 16                     | 3    | 2     | 4     | 2    | 17    | 2     | 17    | 3                   | 1          | 4b; 4d; 4e                  | +            | -            |
| L130/2007                       | Goat            | Brain            | CH      | 17                     | 3    | 2     | 4     | 2    | 17    | 2     | 18    | 3                   | 1          | 4b; 4d; 4e                  | +            | -            |
| L133/2007                       | Bovine          | Brain            | CH      | 16                     | 3    | 2     | 4     | 1    | 17    | 2     | 18    | 3                   | 1          | 4b; 4d; 4e                  | +            | -            |
| L134/2007                       | Bovine          | Brain            | CH      | 16                     | 3    | 2     | 4     | 1    | 17    | 4     | 22    | 3                   | 1          | 4b; 4d; 4e                  | +            | -            |
| L135/2007                       | Bovine          | Brain            | CH      | 17                     | 3    | 2     | 4     | 1    | 17    | 2     | 18    | 3                   | 1          | 4b; 4d; 4e                  | +            | -            |
| L140/2007                       | Bovine          | Brain            | CH      | 16                     | 3    | 2     | 4     | 1    | 17    | 2     | 18    | 3                   | 1          | 4b; 4d; 4e                  | +            | -            |
| L142/2007                       | Bovine          | Brain            | CH      | 17                     | 3    | 2     | 4     | 2    | 17    | 2     | 18    | 3                   | 1          | 4b; 4d; 4e                  | +            | -            |
| L145/2007                       | Deer            | Brain            | CH      | 17                     | 3    | 2     | 5     | 2    | 17    | 0     | 19    | 3                   | 1          | 4b; 4d; 4e                  | +            | -            |
| L146/2007                       | Bovine          | Brain            | CH      | 17                     | 3    | 2     | 4     | 1    | 17    | 2     | 18    | 3                   | 1          | 4b; 4d; 4e                  | +            | -            |
| L147/2008                       | Sheep           | Brain            | CH      | 17                     | 3    | 2     | 4     | 2    | 17    | 2     | 18    | 3                   | 1          | 4b; 4d; 4e                  | +            | -            |
| L148/2008                       | Goat            | Brain            | CH      | 17                     | 2    | 2     | 4     | 2    | 17    | 2     | 18    | 3                   | 1          | 4b; 4d; 4e                  | +            | -            |
| L2/2007                         | Sheep           | Brain            | CH      | 17                     | 3    | 2     | 4     | 2    | 10    | 2     | 18    | 3                   | 1          | 4b; 4d; 4e                  | +            | -            |
| L21/2007                        | Goat            | Brain            | CH      | 17                     | 1    | 2     | 4     | 2    | 17    | 3     | 19    | 3                   | 1          | 4b; 4d; 4e                  | +            | -            |
| L26/2007                        | Sheep           | Brain            | CH      | 17                     | 3    | 2     | 3     | 2    | 17    | 2     | 18    | 3                   | 1          | 4b; 4d; 4e                  | +            | -            |
| L27/2007                        | Sheep           | Brain            | CH      | 17                     | 3    | 2     | 5     | 1    | 17    | 3     | 19    | 3                   | 1          | 4b; 4d; 4e                  | +            | -            |
| L28/2007                        | Sheep           | Brain            | CH      | 17                     | 3    | 2     | 4     | 1    | 17    | 2     | 18    | 3                   | 1          | 4b; 4d; 4e                  | +            | -            |
| L3/2007                         | Sheep           | Brain            | CH      | 17                     | 3    | 2     | 4     | 2    | 17    | 2     | 18    | 3                   | 1          | 4b; 4d; 4e                  | +            | -            |

| Information on the isolate      |        |             |         | MLVA locus copy number |      |       |       |      |       |       |       | Allele <sup>b</sup> |            | PCR serovar                 | PCR reaction |              |
|---------------------------------|--------|-------------|---------|------------------------|------|-------|-------|------|-------|-------|-------|---------------------|------------|-----------------------------|--------------|--------------|
| Isolate <sup>a</sup> (serotype) | origin | origin type | country | Lm-2                   | Lm-8 | Lm-10 | Lm-11 | Lm-3 | Lm-23 | Lm-15 | Lm-32 | <i>actA</i>         | <i>inI</i> | classification <sup>d</sup> | <i>inI F</i> | <i>inI G</i> |
| L32/2007                        | Goat   | Brain       | CH      | 17                     | 3    | 2     | 4     | 2    | 17    | 2     | 18    | 3                   | 1          | 4b; 4d; 4e                  | +            | -            |
| L33/2007                        | Goat   | Brain       | CH      | 17                     | 3    | 2     | 4     | 2    | 17    | 2     | 18    | 3                   | 1          | 4b; 4d; 4e                  | +            | -            |
| L34/2007                        | Sheep  | Brain       | CH      | 22                     | 3    | 2     | 4     | 2    | 17    | 2     | 18    | 3                   | 1          | 4b; 4d; 4e                  | +            | -            |
| L39/2007                        | Sheep  | Brain       | CH      | 16                     | 3    | 2     | 5     | 1    | 17    | 2     | 18    | 3                   | 1          | 4b; 4d; 4e                  | +            | -            |
| L55/2007                        | Sheep  | Brain       | CH      | 17                     | 3    | 2     | 4     | 2    | 17    | 2     | 18    | 3                   | 1          | 4b; 4d; 4e                  | +            | -            |
| L56/2007                        | Sheep  | Brain       | CH      | 9                      | 3    | 3     | 4     | 1    | 17    | 2     | 18    | 3                   | 1          | 4b; 4d; 4e                  | +            | -            |
| L57/2007                        | Sheep  | Brain       | CH      | 16                     | 3    | 2     | 4     | 1    | 17    | 1     | 18    | 3                   | 1          | 4b; 4d; 4e                  | +            | -            |
| L58/2007                        | Sheep  | Brain       | CH      | 16                     | 3    | 2     | 4     | 1    | 17    | 2     | 18    | 3                   | 1          | 4b; 4d; 4e                  | +            | -            |
| L59/2007                        | Sheep  | Brain       | CH      | 16                     | 3    | 3     | 4     | 1    | 17    | 2     | 18    | 3                   | 1          | 4b; 4d; 4e                  | +            | -            |
| L60/2007                        | Sheep  | Brain       | CH      | 16                     | 3    | 2     | 5     | 1    | 17    | 2     | 18    | 3                   | 1          | 4b; 4d; 4e                  | +            | -            |
| L62/2007                        | Sheep  | Brain       | CH      | 17                     | 3    | 2     | 4     | 1    | 17    | 2     | 18    | 3                   | 1          | 4b; 4d; 4e                  | +            | -            |
| L63/2007                        | Sheep  | Brain       | CH      | 16                     | 3    | 2     | 4     | 1    | 17    | 1     | 17    | 3                   | 1          | 4b; 4d; 4e                  | +            | -            |
| L64/2007                        | Sheep  | Brain       | CH      | 17                     | 3    | 2     | 4     | 2    | 17    | 2     | 18    | 3                   | 1          | 4b; 4d; 4e                  | +            | -            |
| L66/2007                        | Sheep  | Brain       | CH      | 17                     | 3    | 2     | 5     | 2    | 17    | 2     | 18    | 3                   | 1          | 4b; 4d; 4e                  | +            | -            |
| L67/2007                        | Sheep  | Brain       | CH      | 17                     | 3    | 2     | 4     | 2    | 17    | 2     | 18    | 3                   | 1          | 4b; 4d; 4e                  | +            | -            |
| L68/2007                        | Sheep  | Brain       | CH      | 18                     | 3    | 2     | 4     | 2    | 17    | 3     | 18    | 3                   | 1          | 4b; 4d; 4e                  | +            | -            |
| L69/2007                        | Sheep  | Brain       | CH      | 15                     | 3    | 3     | 5     | 2    | 17    | 3     | 19    | 3                   | 1          | 4b; 4d; 4e                  | +            | -            |
| L70/2007                        | Sheep  | Brain       | CH      | 17                     | 3    | 3     | 5     | 2    | 17    | 3     | 19    | 3                   | 1          | 4b; 4d; 4e                  | +            | -            |
| L71/2007                        | Sheep  | Brain       | CH      | 18                     | 3    | 2     | 4     | 2    | 17    | 2     | 18    | 3                   | 1          | 4b; 4d; 4e                  | +            | -            |
| L81/2007                        | Bovine | Brain       | CH      | 17                     | 3    | 2     | 4     | 2    | 17    | 2     | 18    | 3                   | 1          | 4b; 4d; 4e                  | +            | -            |
| L82/2007                        | Sheep  | Brain       | CH      | 17                     | 3    | 2     | 4     | 2    | 16    | 2     | 18    | 3                   | 1          | 4b; 4d; 4e                  | +            | -            |
| L83/2007                        | Sheep  | Brain       | CH      | 17                     | 3    | 2     | 4     | 2    | 17    | 2     | 18    | 3                   | 1          | 4b; 4d; 4e                  | +            | -            |
| L85/2007                        | Sheep  | Brain       | CH      | 17                     | 3    | 2     | 4     | 2    | 17    | 2     | 18    | 3                   | 1          | 4b; 4d; 4e                  | +            | -            |
| L88/2007                        | Sheep  | Brain       | CH      | 17                     | 3    | 2     | 4     | 2    | 17    | 2     | 18    | 3                   | 1          | 4b; 4d; 4e                  | +            | -            |
| L9/2007                         | Goat   | Brain       | CH      | 17                     | 3    | 2     | 4     | 2    | 17    | 2     | 18    | 3                   | 1          | 4b; 4d; 4e                  | +            | -            |
| L90/2007                        | Sheep  | Brain       | CH      | 17                     | 3    | 2     | 4     | 2    | 17    | 2     | 18    | 3                   | 1          | 4b; 4d; 4e                  | +            | -            |
| L92/2007                        | Sheep  | Brain       | CH      | 17                     | 3    | 2     | 4     | 2    | 18    | 2     | 18    | 3                   | 1          | 4b; 4d; 4e                  | +            | -            |
| L93/2007                        | Sheep  | Brain       | CH      | 17                     | 3    | 2     | 4     | 2    | 16    | 4     | 23    | 3                   | 1          | 4b; 4d; 4e                  | +            | -            |
| L96/2007                        | Goat   | Brain       | CH      | 15                     | 3    | 2     | 4     | 1    | 14    | 1     | 17    | 4                   | 2          | 1/2a; 3a                    | +            | +            |
| O/D36/08                        | Bovine | Placenta    | CH      | 17                     | 3    | 2     | 4     | 2    | 17    | 3     | 18    | 3                   | 1          | 4b; 4d; 4e                  | +            | -            |
| O/D562/09                       | Bovine | Brain       | CH      | 16                     | 3    | 2     | 4     | 1    | 16    | 2     | 17    | 3                   | 1          | 4b; 4d; 4e                  | +            | -            |

**SLV<sup>f</sup> linked to cluster A**

|                    |                 |                  |    |    |   |   |   |   |    |   |    |   |   |            |    |    |
|--------------------|-----------------|------------------|----|----|---|---|---|---|----|---|----|---|---|------------|----|----|
| CHUV 026/2005 (4b) | Environmental   |                  | CH | 13 | 2 | 2 | 5 | 2 | 21 | 2 | 17 | 4 | 1 | nd         | nd | nd |
| CHUV 072/2006 (4b) | Human; Clinical | CSF <sup>e</sup> | CH | 14 | 2 | 2 | 4 | 1 | 21 | 2 | 17 | 4 | 1 | nd         | +  | +  |
| CHUV 203/2005 (4b) | Human; Clinical | Neonatal inf.    | CH | 14 | 2 | 2 | 5 | 2 | 21 | 2 | 17 | 3 | 1 | 4b; 4d; 4e | +  | +  |
| L126/2007          | Goat            | Brain            | CH | 17 | 3 | 2 | 4 | 1 | 19 | 0 | 15 | 4 | 2 | 1/2a; 3a   | +  | +  |
| L18/2007           | Sheep           | Brain            | CH | 15 | 2 | 2 | 4 | 2 | 21 | 2 | 17 | 4 | 1 | 4b; 4d; 4e | +  | +  |
| L4/2007            | Sheep           | Brain            | CH | 18 | 3 | 5 | 4 | 1 | 17 | 3 | 19 | 3 | 1 | 4b; 4d; 4e | +  | -  |

| Information on the isolate      |                 |                  |         | MLVA locus copy number |      |       |       |      |       |       |       | Allele <sup>b</sup> |            | PCR serovar                 | PCR reaction |              |
|---------------------------------|-----------------|------------------|---------|------------------------|------|-------|-------|------|-------|-------|-------|---------------------|------------|-----------------------------|--------------|--------------|
| Isolate <sup>a</sup> (serotype) | origin          | origin type      | country | Lm-2                   | Lm-8 | Lm-10 | Lm-11 | Lm-3 | Lm-23 | Lm-15 | Lm-32 | <i>actA</i>         | <i>inI</i> | classification <sup>d</sup> | <i>inl F</i> | <i>inl G</i> |
| L78/2007                        | Sheep           | Brain            | CH      | 14                     | 2    | 1     | 4     | 3    | 17    | 2     | 16    | 3                   | 2          | 4b; 4d; 4e                  | +            | -            |
| <b>Clonal complex B</b>         |                 |                  |         |                        |      |       |       |      |       |       |       |                     |            |                             |              |              |
| L114/2007                       | Bovine          | Brain            | CH      | 16                     | 2    | 4     | 3     | 2    | 14    | 4     | 16    | 3                   | 2          | 4b; 4d; 4e                  | +            | -            |
| L161/2008                       | Bovine          | Brain            | CH      | 16                     | 2    | 4     | 3     | 2    | 16    | 4     | 17    | 3                   | 1          | 1/2b; 3b; 7                 | +            | -            |
| CHUV 005/2007 (4b)              | Food            |                  | CH      | 16                     | 2    | 5     | 3     | 2    | 14    | 4     | 17    | 3                   | 2          | nd                          | nd           | nd           |
| CHUV 016/2007 (4b)              | Human; Clinical | CSF <sup>e</sup> | CH      | 16                     | 2    | 4     | 3     | 2    | 14    | 4     | 17    | 3                   | 2          | nd                          | +            | -            |
| CHUV 162/2006 (4b)              | Human; Clinical | CSF <sup>e</sup> | CH      | 16                     | 2    | 4     | 3     | 2    | 14    | 4     | 17    | 4                   | 2          | 4b; 4d; 4e                  | +            | -            |
| CHUV 141/2006 (4b)              | Human; Clinical | Neonatal inf.    | CH      | 17                     | 2    | 4     | 3     | 3    | 14    | 4     | 17    | 3                   | 2          | 4b; 4d; 4e                  | +            | -            |
| CHUV 186/2006 (4b)              | Human; Clinical | CSF <sup>e</sup> | CH      | 16                     | 2    | 4     | 3     | 3    | 14    | 4     | 17    | 3                   | 2          | 4b; 4d; 4e                  | nd           | -            |
| CHUV 176/2006 (4b)              | Human; Clinical | Neonatal inf.    | CH      | 17                     | 2    | 2     | 3     | 3    | 14    | 4     | 17    | 3                   | 2          | 4b; 4d; 4e                  | +            | -            |
| L13/2007                        | Sheep           | Brain            | CH      | 17                     | 2    | 4     | 3     | 3    | 14    | 4     | 17    | 3                   | 2          | 4b; 4d; 4e                  | +            | -            |
| L157/2008                       | Sheep           | Brain            | CH      | 17                     | 2    | 4     | 3     | 3    | 14    | 4     | 17    | 3                   | 2          | 4b; 4d; 4e                  | +            | -            |
| L162/2008                       | Sheep           | Brain            | CH      | 16                     | 2    | 4     | 3     | 3    | 14    | 4     | 17    | 3                   | 2          | 4b; 4d; 4e                  | +            | -            |
| L73/2007                        | Sheep           | Brain            | CH      | 14                     | 2    | 4     | 3     | 3    | 14    | 4     | 17    | 3                   | 2          | 4b; 4d; 4e                  | +            | -            |
| L77/2007                        | Sheep           | Brain            | CH      | 17                     | 2    | 4     | 3     | 3    | 14    | 5     | 17    | 3                   | 3          | 4b; 4d; 4e                  | +            | -            |
| L42/2007                        | Sheep           | Brain            | CH      | 28                     | 2    | 4     | 4     | 2    | 14    | 4     | 17    | 3                   | 2          | 4b; 4d; 4e                  | +            | -            |
| <b>SLV linked to Cluster B</b>  |                 |                  |         |                        |      |       |       |      |       |       |       |                     |            |                             |              |              |
| L122/2007                       | Bovine          | Brain            | CH      | 17                     | 2    | 4     | 3     | 2    | 14    | 3     | 24    | 3                   | 2          | 4b; 4d; 4e                  | +            | -            |
| L41/2007                        | Sheep           | Brain            | CH      | 16                     | 2    | 10    | 4     | 2    | 13    | 4     | 17    | 3                   | 2          | 4b; 4d; 4e                  | +            | -            |
| <b>Clonal complex C</b>         |                 |                  |         |                        |      |       |       |      |       |       |       |                     |            |                             |              |              |
| A156                            | Bovine          | Placenta         | CH      | 19                     | 2    | 2     | 3     | 8    | 21    | 2     | 14    | 4                   | 2          | nd                          | nd           | nd           |
| CHUV 003/2005 (1/2a)            | Environmental   |                  | CH      | 19                     | 2    | 2     | 3     | 5    | 23    | 1     | 14    | 4                   | 2          | nd                          | nd           | nd           |
| CHUV 031/2005 (1/2a)            | Environmental   |                  | CH      | 17                     | 2    | 2     | 3     | 1    | 20    | 3     | 14    | 3                   | 3          | nd                          | nd           | nd           |
| CHUV 052/2006 (1/2a)            | Human; Clinical | CSF <sup>e</sup> | CH      | 21                     | 2    | 2     | 3     | 4    | 13    | 1     | 13    | 4                   | 2          | nd                          | +            | +            |
| CHUV 053/2005 (1/2a)            | Human; Clinical | Neonatal inf.    | CH      | 17                     | 2    | 2     | 4     | 1    | 11    | 1     | 13    | 4                   | 2          | nd                          | +            | +            |
| CHUV 055/2007 (1/2a)            | Food            |                  | CH      | 21                     | 2    | 2     | 3     | 2    | 11    | 1     | 14    | 4                   | 2          | nd                          | nd           | nd           |
| CHUV 091/2005 (1/2a)            | Human; Clinical | Neonatal inf.    | CH      | 18                     | 2    | 2     | 3     | 7    | 19    | 1     | 14    | 4                   | 2          | nd                          | +            | +            |
| CHUV 092/2005 (1/2a)            | Human; Clinical | Neonatal inf.    | CH      | 19                     | 2    | 2     | 3     | 7    | 19    | 1     | 14    | 4                   | 2          | nd                          | +            | +            |
| CHUV 153/2005 (1/2a)            | Environmental   |                  | CH      | 18                     | 2    | 2     | 4     | 6    | 22    | 1     | 13    | 4                   | 2          | 1/2a; 3a                    | nd           | nd           |
| CHUV 179/2006 (1/2a)            | Food            |                  | CH      | 17                     | 2    | 2     | 3     | 1    | 20    | 3     | 14    | 3                   | 3          | 1/2a; 3a                    | nd           | nd           |
| CHUV 181/2006 (1/2a)            | Food            |                  | CH      | 22                     | 2    | 2     | 3     | 7    | 11    | 1     | 14    | 4                   | 2          | 1/2c; 3c                    | nd           | nd           |
| CHUV 188/2005 (1/2a)            | Environmental   |                  | CH      | 15                     | 2    | 2     | 3     | 8    | 19    | 2     | 14    | 4                   | 2          | 1/2a; 3a                    | nd           | nd           |
| CHUV 206/2005 (1/2a)            | Environmental   |                  | CH      | 17                     | 2    | 2     | 3     | 1    | 20    | 3     | 14    | 3                   | 3          | 1/2a; 3a                    | nd           | nd           |

| Information on the isolate      |        |             |         | MLVA locus copy number |      |       |       |      |       |       |       | Allele <sup>b</sup> |            | PCR serovar                 | PCR reaction |              |
|---------------------------------|--------|-------------|---------|------------------------|------|-------|-------|------|-------|-------|-------|---------------------|------------|-----------------------------|--------------|--------------|
| Isolate <sup>a</sup> (serotype) | origin | origin type | country | Lm-2                   | Lm-8 | Lm-10 | Lm-11 | Lm-3 | Lm-23 | Lm-15 | Lm-32 | <i>actA</i>         | <i>inI</i> | classification <sup>d</sup> | <i>inl F</i> | <i>inl G</i> |
| GL10                            | Food   | Poultry     | GR      | 21                     | 2    | 2     | 6     | 6    | 11    | 1     | 13    | 4                   | 2          | 1/2c; 3c                    | +            | nd           |
| GL11                            | Food   | Poultry     | GR      | 21                     | 2    | 2     | 3     | 7    | 11    | 2     | 14    | 4                   | 2          | 1/2c; 3c                    | +            | nd           |
| GL12                            | Food   | Beef        | GR      | 23                     | 2    | 2     | 3     | 6    | 1     | 1     | 13    | 4                   | 2          | 1/2c; 3c                    | +            | nd           |
| GL13                            | Food   | Beef        | GR      | 20                     | 2    | 2     | 3     | 5    | 8     | 1     | 13    | 4                   | 2          | 1/2a; 3a                    | +            | nd           |
| GL14                            | Food   | Beef        | GR      | 21                     | 2    | 2     | 3     | 6    | 1     | 0     | 15    | 4                   | 2          | 1/2c; 3c                    | +            | nd           |
| GL15                            | Food   | Beef        | GR      | 23                     | 2    | 2     | 3     | 6    | 1     | 1     | 13    | 4                   | 2          | 1/2c; 3c                    | +            | nd           |
| GL16                            | Food   | Cheese      | GR      | 22                     | 2    | 2     | 3     | 6    | 1     | 1     | 13    | 4                   | 2          | 1/2c; 3c                    | +            | nd           |
| GL17                            | Food   | Cheese      | GR      | 21                     | 2    | 2     | 3     | 6    | 1     | 1     | 13    | 4                   | 2          | 1/2c; 3c                    | +            | nd           |
| GL18                            | Food   | Cheese      | GR      | 24                     | 2    | 2     | 3     | 7    | 1     | 2     | 14    | 4                   | 2          | 1/2c; 3c                    | +            | nd           |
| GL19                            | Food   | Cheese      | GR      | 21                     | 2    | 3     | 3     | 6    | 21    | 2     | 14    | 4                   | 2          | 1/2a; 3a                    | +            | nd           |
| GL2                             | Food   | Meat prod.  | GR      | 17                     | 2    | 2     | 3     | 5    | 22    | 1     | 13    | 4                   | 2          | 1/2a; 3a                    | +            | nd           |
| GL20                            | Food   | Fish        | GR      | 21                     | 2    | 3     | 3     | 6    | 21    | 2     | 14    | 4                   | 2          | 1/2a; 3a                    | +            | nd           |
| GL21                            | Food   | Fish        | GR      | 21                     | 2    | 2     | 3     | 6    | 22    | 2     | 14    | 4                   | 2          | 1/2a; 3a                    | +            | nd           |
| GL22                            | Food   | Fish        | GR      | 24                     | 2    | 2     | 3     | 7    | 11    | 2     | 14    | 4                   | 2          | 1/2c; 3c                    | nd           | nd           |
| GL23                            | Food   | Fish        | GR      | 21                     | 2    | 2     | 3     | 6    | 21    | 2     | 14    | 4                   | 2          | 1/2a; 3a                    | nd           | nd           |
| GL24                            | Food   | Fish        | GR      | 24                     | 2    | 2     | 3     | 7    | 11    | 2     | 14    | 4                   | 2          | 1/2c; 3c                    | nd           | nd           |
| GL25                            | Food   | Fish        | GR      | 24                     | 2    | 2     | 3     | 7    | 11    | 2     | 14    | 4                   | 2          | 1/2c; 3c                    | nd           | nd           |
| GL26                            | Food   | Meat prod.  | GR      | 21                     | 2    | 2     | 3     | 6    | 21    | 0     | 15    | 4                   | 2          | 1/2a; 3a                    | nd           | nd           |
| GL28                            | Food   | Meat prod.  | GR      | 24                     | 2    | 2     | 3     | 7    | 11    | 2     | 14    | 4                   | 2          | 1/2c; 3c                    | nd           | nd           |
| GL29                            | Food   | Meat prod.  | GR      | 24                     | 2    | 2     | 3     | 7    | 10    | 2     | 14    | 4                   | 2          | 1/2c; 3c                    | nd           | nd           |
| GL30                            | Food   | Meat prod.  | GR      | 21                     | 2    | 3     | 4     | 6    | 21    | 2     | 14    | 4                   | 2          | 1/2a; 3a                    | nd           | nd           |
| GL4                             | Food   | Meat prod.  | GR      | 18                     | 2    | 2     | 3     | 6    | 8     | 1     | 13    | 4                   | 2          | 1/2a; 3a                    | +            | nd           |
| GL5                             | Food   | Poultry     | GR      | 21                     | 2    | 2     | 2     | 6    | 22    | 1     | 13    | 4                   | 2          | 1/2a; 3a                    | +            | nd           |
| GL6                             | Food   | Poultry     | GR      | 18                     | 2    | 2     | 3     | 5    | 7     | 1     | 13    | 4                   | 2          | 1/2c; 3c                    | +            | nd           |
| GL7                             | Food   | Poultry     | GR      | 18                     | 2    | 2     | 3     | 7    | 11    | 1     | 14    | 4                   | 2          | 1/2c; 3c                    | +            | nd           |
| GL8                             | Food   | Poultry     | GR      | 18                     | 2    | 2     | 3     | 1    | 3     | 1     | 13    | 4                   | 2          | 1/2a; 3a                    | +            | nd           |
| GL9                             | Food   | Poultry     | GR      | 19                     | 2    | 2     | 2     | 5    | 8     | 1     | 14    | 4                   | 2          | 1/2a; 3a                    | +            | nd           |
| L127/2007                       | Goat   | Brain       | CH      | 16                     | 2    | 2     | 3     | 4    | 20    | 3     | 14    | 4                   | 2          | 1/2a; 3a                    | +            | +            |
| L138/2007                       | Bovine | Brain       | CH      | 18                     | 2    | 2     | 4     | 7    | 20    | 1     | 14    | 3                   | 2          | 1/2a; 3a                    | +            | +            |
| L23/2007                        | Sheep  | Brain       | CH      | 14                     | 2    | 2     | 3     | 2    | 18    | 1     | 14    | 3                   | 2          | 1/2a; 3a                    | +            | +            |
| L38/2007                        | Sheep  | Brain       | CH      | 16                     | 2    | 2     | 3     | 4    | 18    | 3     | 14    | 3                   | 1          | 1/2b; 3b; 7                 | -            | -            |
| L40/2007                        | Goat   | Brain       | CH      | 19                     | 2    | 2     | 3     | 3    | 13    | 1     | 14    | 4                   | 2          | 1/2a; 3a                    | +            | +            |
| L43/2007                        | Sheep  | Brain       | CH      | 17                     | 2    | 2     | 3     | 1    | 18    | 1     | 14    | 4                   | 3          | 1/2a; 3a                    | -            | -            |
| L44/2007                        | Sheep  | Brain       | CH      | 18                     | 2    | 2     | 3     | 1    | 18    | 1     | 14    | 4                   | 3          | 1/2a; 3a                    | -            | -            |
| L48/2007                        | Goat   | Brain       | CH      | 18                     | 2    | 2     | 4     | 14   | 20    | 1     | 13    | 4                   | 2          | 1/2a; 3a                    | +            | +            |
| L49/2007                        | Goat   | Brain       | CH      | 18                     | 2    | 2     | 4     | 1    | 12    | 1     | 13    | 4                   | 2          | 1/2a; 3a                    | +            | +            |
| L5/2007                         | Sheep  | Brain       | CH      | 19                     | 2    | 2     | 4     | 9    | 20    | 2     | 14    | 3                   | 2          | 1/2a; 3a                    | +            | +            |
| L51/2007                        | Sheep  | Brain       | CH      | 16                     | 2    | 2     | 3     | 1    | 21    | 1     | 13    | 4                   | 2          | 1/2a; 3a                    | +            | +            |
| L52/2007                        | Goat   | Brain       | CH      | 21                     | 2    | 3     | 3     | 6    | 18    | 1     | 14    | 4                   | 2          | 1/2a; 3a                    | +            | +            |
| L61/2007                        | Sheep  | Brain       | CH      | 19                     | 2    | 2     | 4     | 4    | 22    | 1     | 13    | 4                   | 2          | 1/2a; 3a                    | +            | +            |

| Information on the isolate      |                 |                  |         | MLVA locus copy number |      |       |       |      |       |       |       | Allele <sup>b</sup> |            | PCR serovar                 | PCR reaction |              |
|---------------------------------|-----------------|------------------|---------|------------------------|------|-------|-------|------|-------|-------|-------|---------------------|------------|-----------------------------|--------------|--------------|
| Isolate <sup>a</sup> (serotype) | origin          | origin type      | country | Lm-2                   | Lm-8 | Lm-10 | Lm-11 | Lm-3 | Lm-23 | Lm-15 | Lm-32 | <i>actA</i>         | <i>inJ</i> | classification <sup>d</sup> | <i>inl F</i> | <i>inl G</i> |
| L95/2007                        | Goat            | Brain            | CH      | 17                     | 2    | 2     | 4     | 10   | 14    | 1     | 13    | 4                   | 3          | 1/2a; 3a                    | +            | -            |
| L97/2007                        | Sheep           | Brain            | CH      | 18                     | 2    | 2     | 3     | 6    | 22    | 1     | 13    | 4                   | 2          | 1/2a; 3a                    | +            | +            |
| O/D115/04                       | Sheep           | Brain            | CH      | 19                     | 2    | 2     | 3     | 10   | 20    | 2     | 14    | 4                   | 2          | nd                          | nd           | nd           |
| O/D1387/06                      | Bovine          | Placenta         | CH      | 19                     | 2    | 2     | 3     | 1    | 14    | 2     | 14    | 4                   | 2          | 1/2a; 3a                    | +            | +            |
| <b>SLV linked to cluster C</b>  |                 |                  |         |                        |      |       |       |      |       |       |       |                     |            |                             |              |              |
| CHUV 014/2005 (1/2b)            | Environmental   |                  | CH      | 17                     | 2    | 2     | 4     | 4    | 16    | 3     | 15    | 3                   | 1          | nd                          | nd           | nd           |
| CHUV 128/2006 (1/2a)            | Human; Clinical | Neonatal inf.    | CH      | 20                     | 2    | 2     | 0     | 2    | 11    | 2     | 14    | 3                   | 2          | 1/2a; 3a                    | +            | +            |
| L84/2007                        | Goat            | Brain            | CH      | 18                     | 2    | 2     | 5     | 3    | 17    | 0     | 13    | 4                   | 1          | 4b; 4d; 4e                  | +            | -            |
| CHUV 009/2007 (1/2a)            | Human; Clinical | Neonatal inf.    | CH      | 18                     | 2    | 2     | 0     | 1    | 11    | 2     | 14    | 4                   | 2          | nd                          | +            | +            |
| CHUV 031/2007 (1/2a)            | Food            |                  | CH      | 20                     | 2    | 2     | 0     | 2    | 11    | 0     | 0     | 4                   | 2          | nd                          | nd           | nd           |
| CHUV 083/2006 (1/2b)            | Human; Clinical | CSF <sup>e</sup> | CH      | 18                     | 2    | 1     | 4     | 4    | 16    | 3     | 15    | 3                   | 1          | nd                          | +            | -            |
| CHUV 157/2005 (1/2b)            | Environmental   |                  | CH      | 16                     | 2    | 2     | 4     | 4    | 16    | 6     | 15    | 3                   | 1          | 1/2b; 3b; 7                 | nd           | nd           |
| L35/2007                        | Sheep           | Brain            | CH      | 18                     | 2    | 2     | 5     | 3    | 12    | 0     | 14    | 4                   | 2          | 1/2a; 3a                    | +            | +            |
| L87/2007                        | Goat            | Brain            | CH      | 18                     | 2    | 2     | 5     | 2    | 17    | 1     | 13    | 4                   | 1          | 4b; 4d; 4e                  | +            | -            |
| CHUV 007/2007 (1/2a)            | Food            |                  | CH      | 16                     | 2    | 2     | 3     | 1    | 15    | 2     | 16    | 4                   | 2          | nd                          | nd           | nd           |
| CHUV 019/2007 (1/2a)            | Food            |                  | CH      | 23                     | 2    | 2     | 3     | 6    | 11    | 0     | 14    | 4                   | 2          | nd                          | nd           | nd           |
| CHUV 022/2007 (1/2a)            | Food            |                  | CH      | 22                     | 2    | 2     | 3     | 9    | 12    | 2     | 17    | 4                   | 2          | nd                          | nd           | nd           |
| CHUV 051/2005 (1/2b)            | Environmental   |                  | CH      | 16                     | 2    | 2     | 1     | 2    | 15    | 0     | 15    | 3                   | 1          | nd                          | nd           | nd           |
| CHUV 062/2005 (1/2a)            | Environmental   |                  | CH      | 17                     | 2    | 3     | 0     | 2    | 11    | 1     | 14    | 4                   | 2          | nd                          | nd           | nd           |
| CHUV 174/2006 (1/2b)            | Food            |                  | CH      | 16                     | 2    | 2     | 5     | 4    | 15    | 3     | 15    | 3                   | 1          | 1/2b; 3b; 7                 | nd           | nd           |
| CHUV 178/2006 (1/2a)            | Food            |                  | CH      | 12                     | 1    | 2     | 3     | 5    | 21    | 0     | 13    | 4                   | 2          | 1/2a; 3a                    | nd           | nd           |
| CHUV 200/2005 (1/2a)            | Human; Clinical | CSF <sup>e</sup> | CH      | 22                     | 2    | 3     | 0     | 3    | 13    | 0     | 12    | 4                   | 2          | 1/2a; 3a                    | +            | +            |
| CHUV 227/2005 (1/2a)            | Human; Clinical | CSF <sup>e</sup> | CH      | 17                     | 2    | 8     | ?     | 4    | 15    | 0     | 13    | 4                   | 2          | 1/2a; 3a                    | +            | +            |
| GL1                             | Food            | Meat prod.       | GR      | 12                     | 2    | 2     | 3     | 0    | 11    | 0     | 13    | 4                   | 2          | nd                          | +            | nd           |
| GL31                            | Food            | Meat prod.       | GR      | 19                     | 2    | 4     | 5     | 6    | 22    | 2     | 15    | 4                   | 3          | 1/2a; 3a                    | nd           | nd           |
| GL32                            | Food            | Meat prod.       | GR      | 18                     | 2    | 4     | 0     | 5    | 22    | 2     | 15    | 4                   | 2          | 1/2a; 3a                    | nd           | nd           |
| L10/2007                        | Sheep           | Brain            | CH      | 23                     | 2    | 2     | 4     | 10   | 22    | 2     | 14    | 4                   | 2          | 1/2a; 3a                    | +            | +            |
| L131/2007                       | Goat            | Brain            | CH      | 23                     | 2    | 2     | 3     | 3    | 12    | 2     | 14    | 4                   | 2          | 1/2a; 3a                    | +            | +            |
| L132/2007                       | Goat            | Brain            | CH      | 22                     | 2    | 2     | 3     | 6    | 19    | 2     | 15    | 4                   | 2          | 1/2a; 3a                    | +            | +            |
| L143/2007                       | Bovine          | Brain            | CH      | 19                     | 2    | 2     | 0     | 6    | 20    | 1     | 14    | 3                   | 2          | 1/2a; 3a                    | +            | +            |
| L22/2007                        | Sheep           | Brain            | CH      | 21                     | 2    | 3     | 5     | 5    | 22    | 2     | 14    | 4                   | 2          | 1/2a; 3a                    | +            | +            |
| L36/2007                        | Sheep           | Brain            | CH      | 19                     | 2    | 2     | 0     | 2    | 16    | 1     | 15    | 4                   | 2          | 1/2a; 3a                    | -            | -            |
| L45/2007                        | Goat            | Brain            | CH      | 18                     | 2    | 2     | 5     | 9    | 20    | 0     | 11    | 4                   | 2          | 1/2a; 3a                    | +            | +            |
| L46/2007                        | Goat            | Brain            | CH      | 21                     | 2    | 2     | 2     | 1    | 12    | 1     | 12    | 4                   | 2          | 1/2a; 3a                    | +            | +            |
| L47/2007                        | Goat            | Brain            | CH      | 18                     | 2    | 2     | 1     | 2    | 16    | 0     | 12    | 4                   | 2          | 1/2a; 3a                    | -            | -            |
| L50/2007                        | Goat            | Brain            | CH      | 20                     | 3    | 2     | 3     | 1    | 21    | 1     | 14    | 4                   | 2          | 1/2a; 3a                    | +            | +            |
| L54/2007                        | Sheep           | Brain            | CH      | 20                     | 2    | 3     | 5     | 5    | 22    | 1     | 13    | 4                   | 2          | 1/2a; 3a                    | +            | +            |

| Information on the isolate      |        |             |         | MLVA locus copy number |      |       |       |      |       |       |       | Allele <sup>b</sup> |            | PCR serovar                 | PCR reaction |              |
|---------------------------------|--------|-------------|---------|------------------------|------|-------|-------|------|-------|-------|-------|---------------------|------------|-----------------------------|--------------|--------------|
| Isolate <sup>a</sup> (serotype) | origin | origin type | country | Lm-2                   | Lm-8 | Lm-10 | Lm-11 | Lm-3 | Lm-23 | Lm-15 | Lm-32 | <i>actA</i>         | <i>inJ</i> | classification <sup>d</sup> | <i>inl F</i> | <i>inl G</i> |
| L74/2007                        | Sheep  | Brain       | CH      | 19                     | 2    | 2     | 3     | 4    | 16    | 0     | 14    | 4                   | 2          | 1/2a; 3a                    | +            | +            |
| L76/2007                        | Sheep  | Brain       | CH      | 30                     | 2    | 2     | 3     | 6    | 12    | 1     | 14    | 4                   | 2          | 1/2a; 3a                    | +            | +            |
| L86/2007                        | Sheep  | Brain       | CH      | 22                     | 2    | 2     | 4     | 2    | 10    | 2     | 14    | 4                   | 2          | 1/2a; 3a                    | +            | +            |
| O/D1171/06                      | Bovine | Placenta    | CH      | 21                     | 2    | 2     | 3     | 2    | 10    | 6     | 15    | 4                   | 2          | 1/2a; 3a                    | +            | -            |

<sup>a</sup> CHUV, Centre Hospitalier Universitaire Vaudoise, Lausanne, Switzerland; L, O/D and A, Institute of Veterinary Bacteriology, ZOBA, Vetsuisse Faculty, Bern, Switzerland; GL, Department of Medicine, Veterinary School, University of Thessaly, Greece.

<sup>b</sup> actA4 corresponds to 1067 bp, actA3 - 962 bp, inlJ1 - 780 bp, inlJ2 - 570 bp, inlJ3 - 357 bp.

<sup>c</sup> nd, not done.

<sup>d</sup> According to Doumith et al. 2004

<sup>e</sup> CSF, cerebrospinal fluid.

<sup>f</sup> SLV, single locus variant.
